# Supplementary material
Source: publisher figshare collection journal article supplement (https://tandf.figshare.com/ndownloader/files/14452811)

**APPENDIX 1: Adapted MPC and MSC scales**


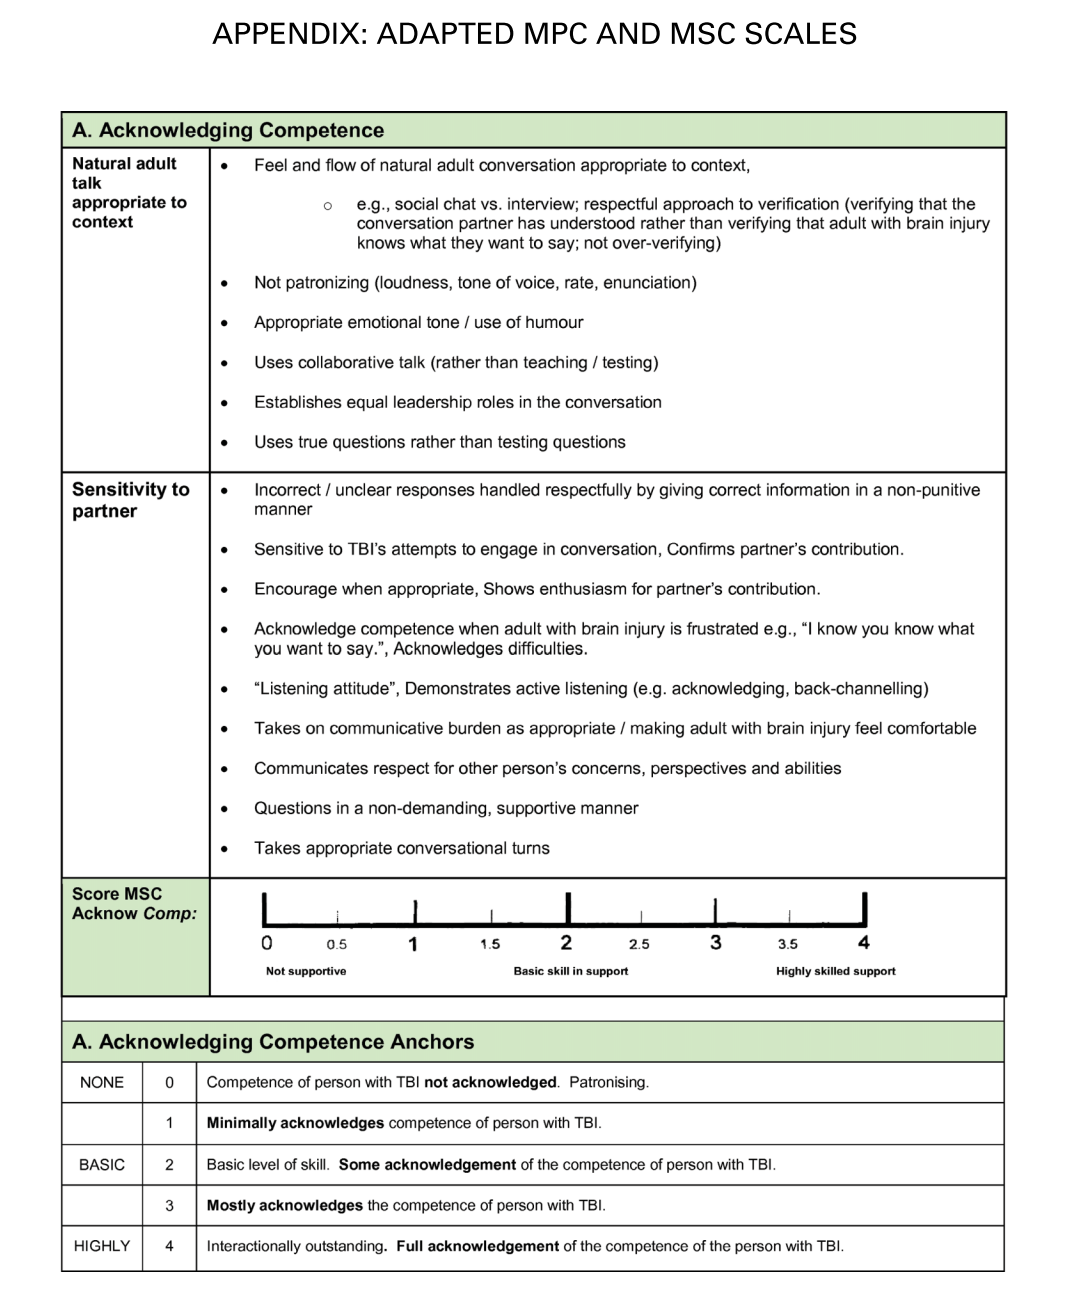


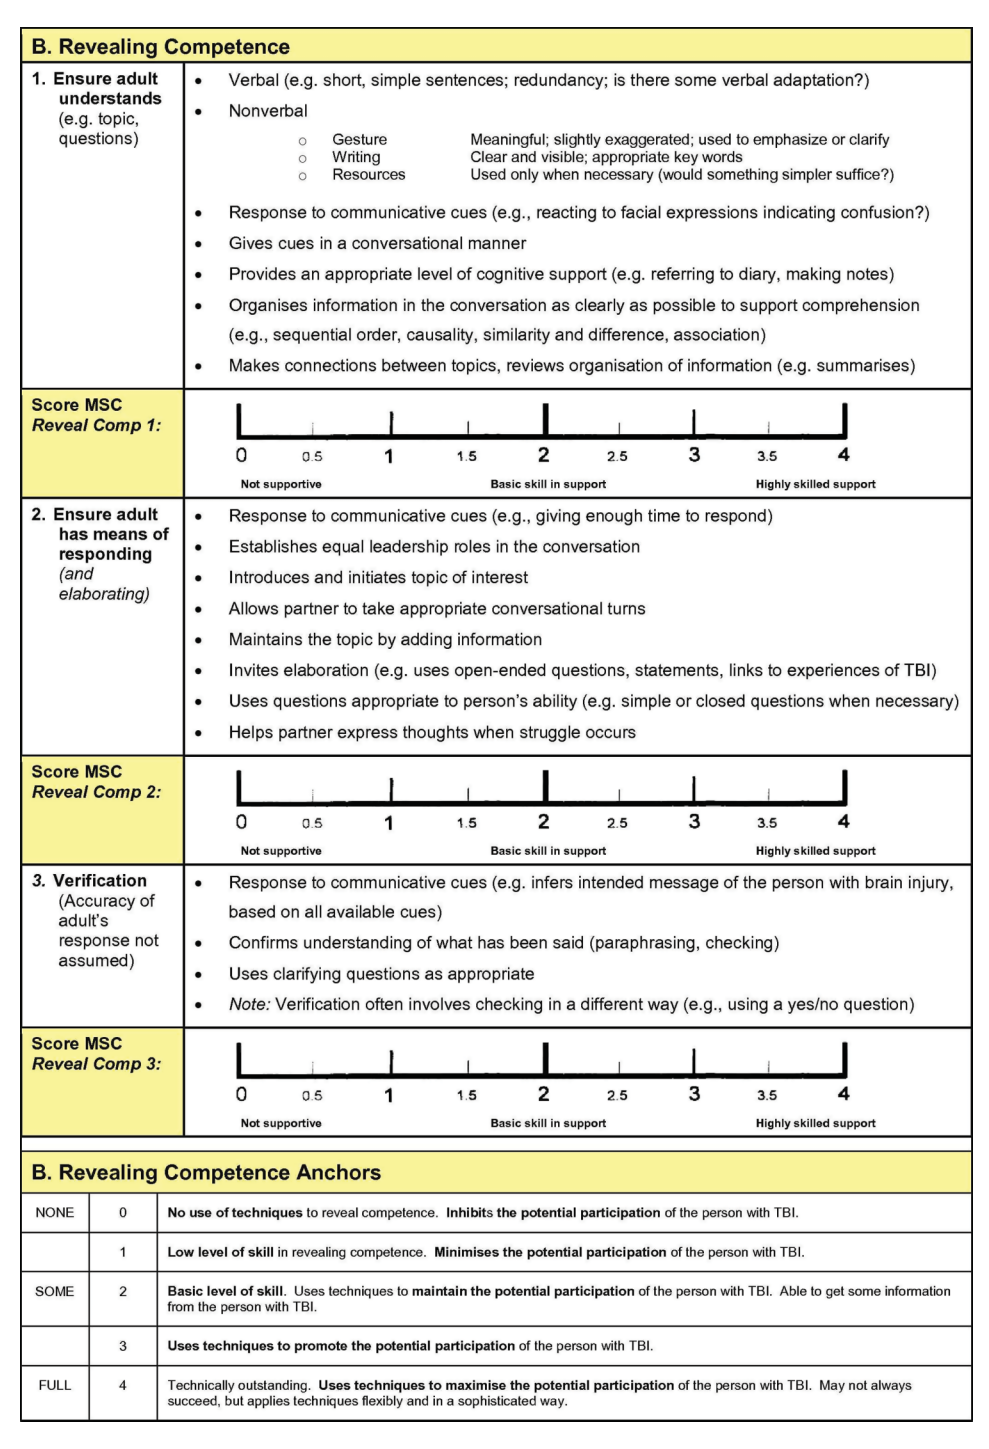


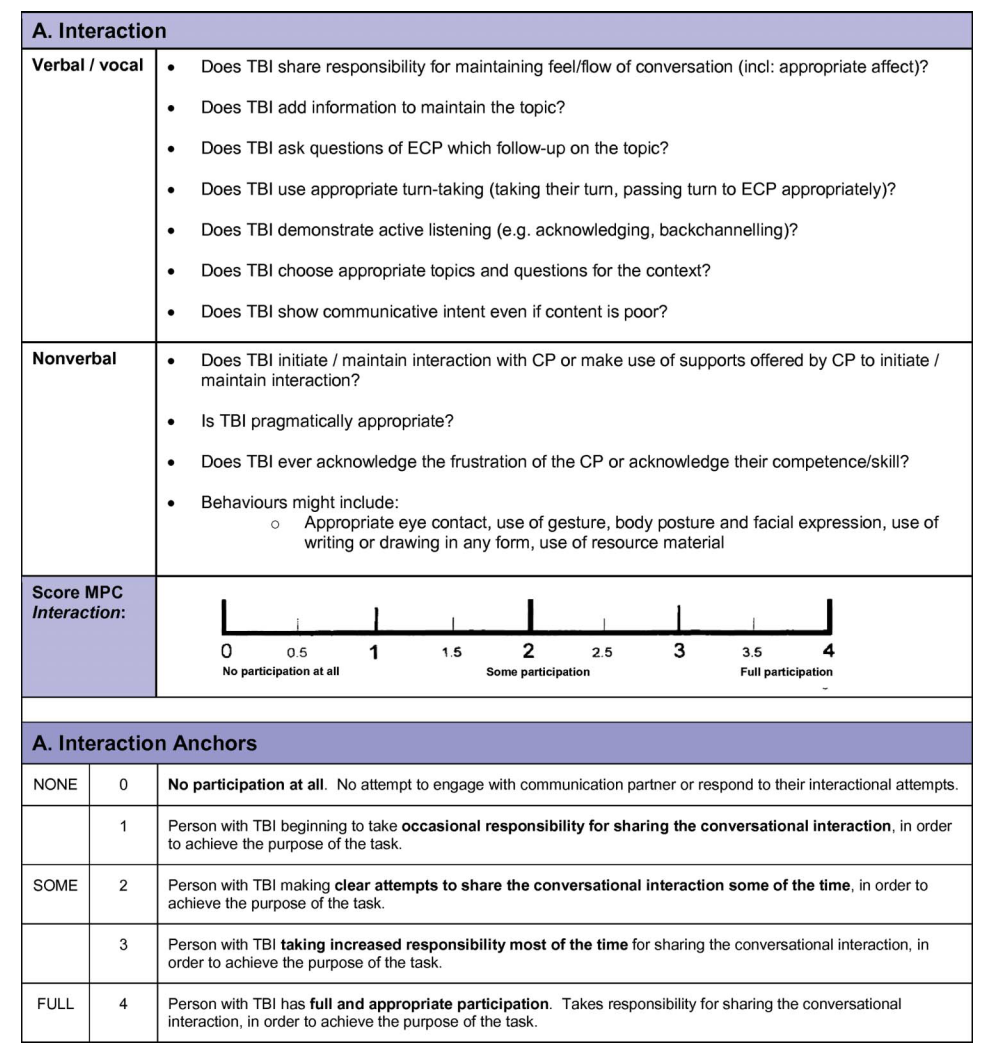


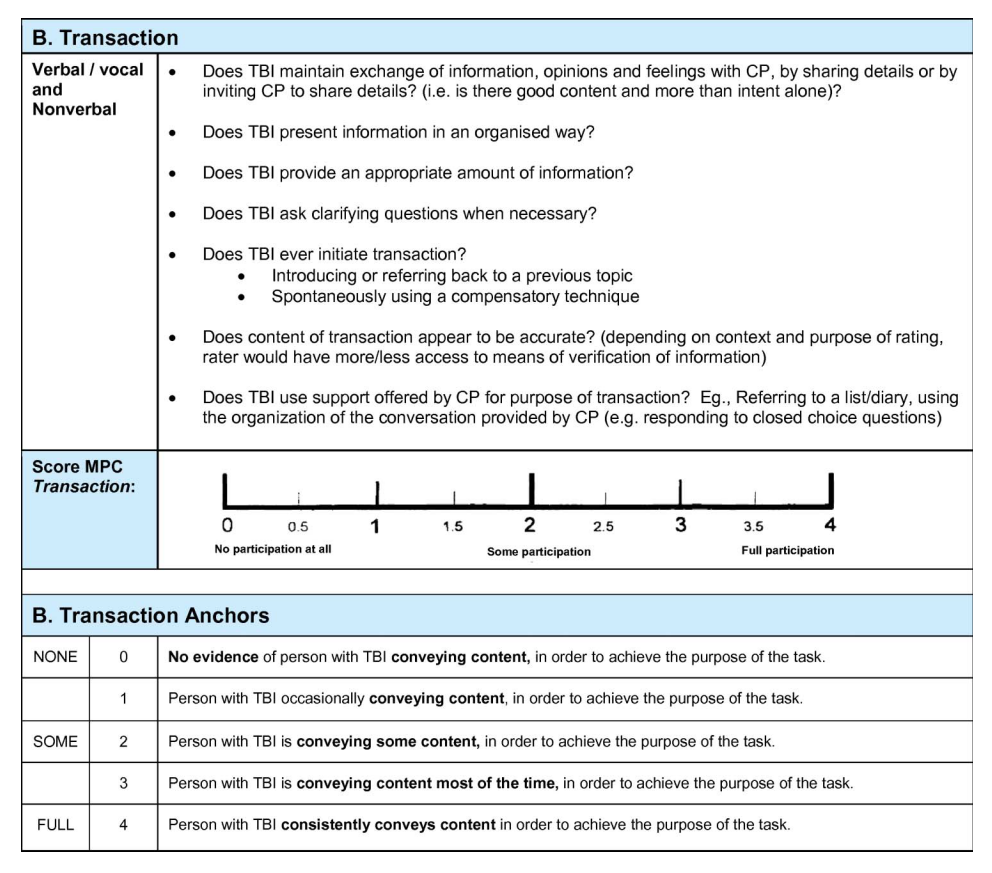

Supplement: Supplementary file 1 [file 14452811]
